# Supplementary material for: Ionic liquid-assisted catalysis for glycosidation of two triterpenoid sapogenins
Source: Royal Society of Chemistry journal article supplement (doi:10.1039/c9nj04271g), 2019-01-01
Supplement: c9nj04271g1.pdf [file c9nj04271g1.pdf]

### 1. Characterization of oleanolic 3-O- $\beta$ -D-2,3,4,6-benzoyl-glucopyranosyl-28-ally ester

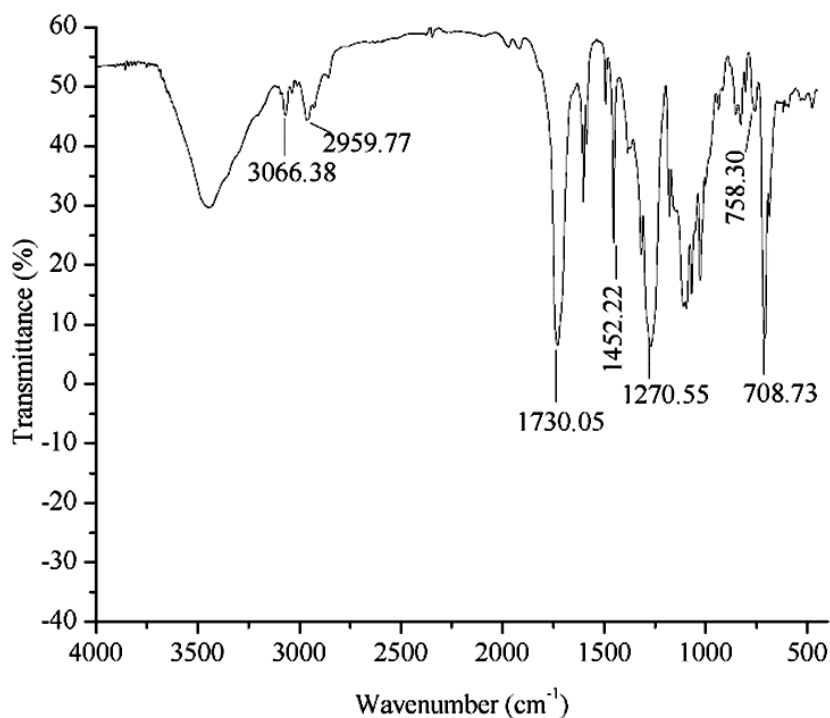

Figure S1. IR spectrum of protected oleanolic acid saponin (KBr disc)

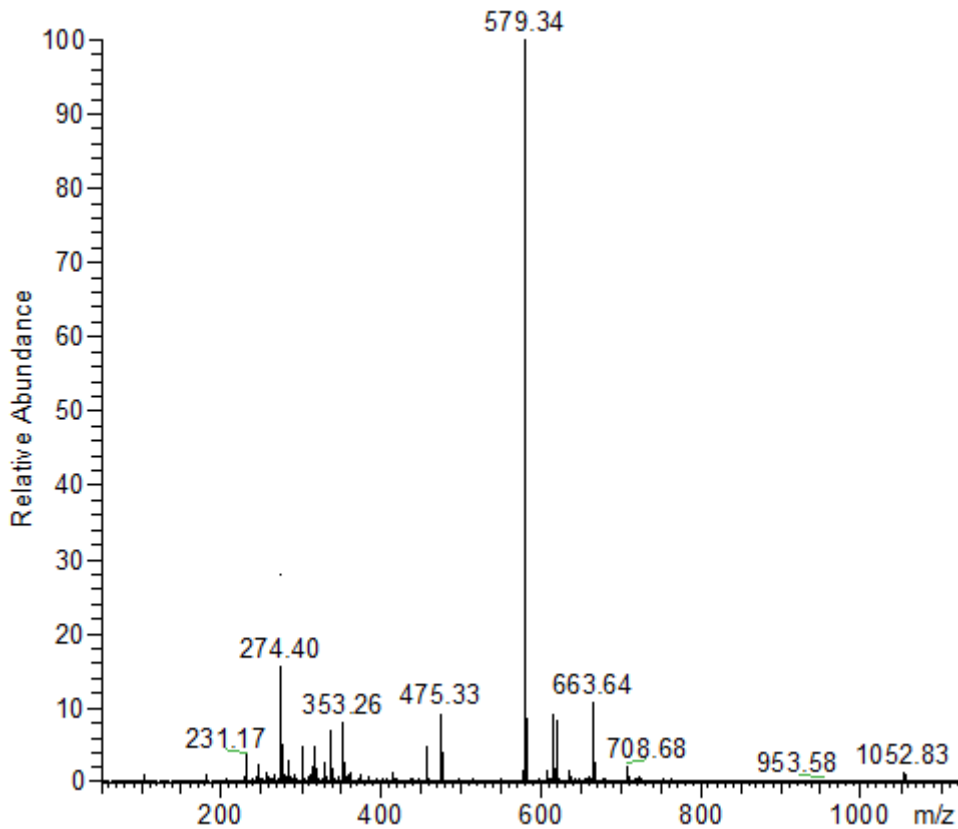

Figure S2. ESI-MS of protected oleanolic acid saponin (3.0 kV, 150°C, drying gas:  $\text{N}_2$ )

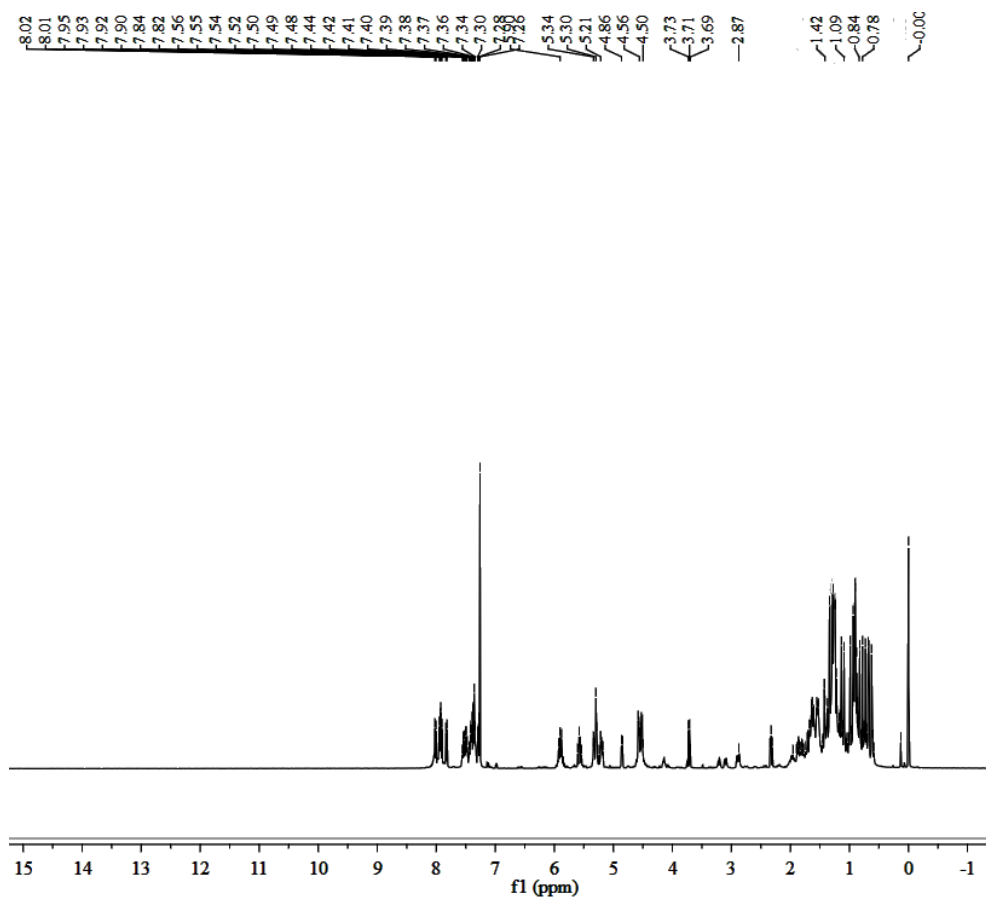

**Figure S3.**  $^1\text{H-NMR}$  spectrum of protected oleanolic acid saponin (400 MHz,  $\text{CDCl}_3$ )

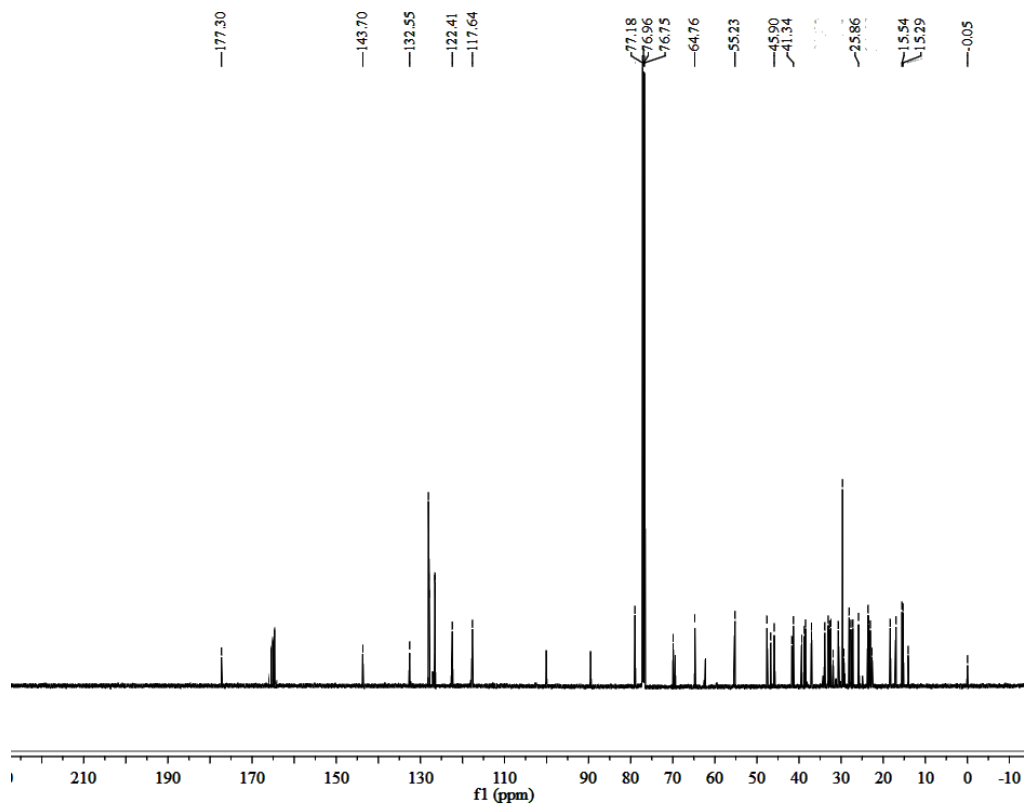

**Figure S4.**  $^{13}\text{C-NMR}$  spectrum of protected oleanolic acid saponin (100 MHz,  $\text{CDCl}_3$ )

## 2. Characterization of ursolic 3-O- $\beta$ -D-2,3,4,6-benzoyl-glucopyranosyl-28-ally ester

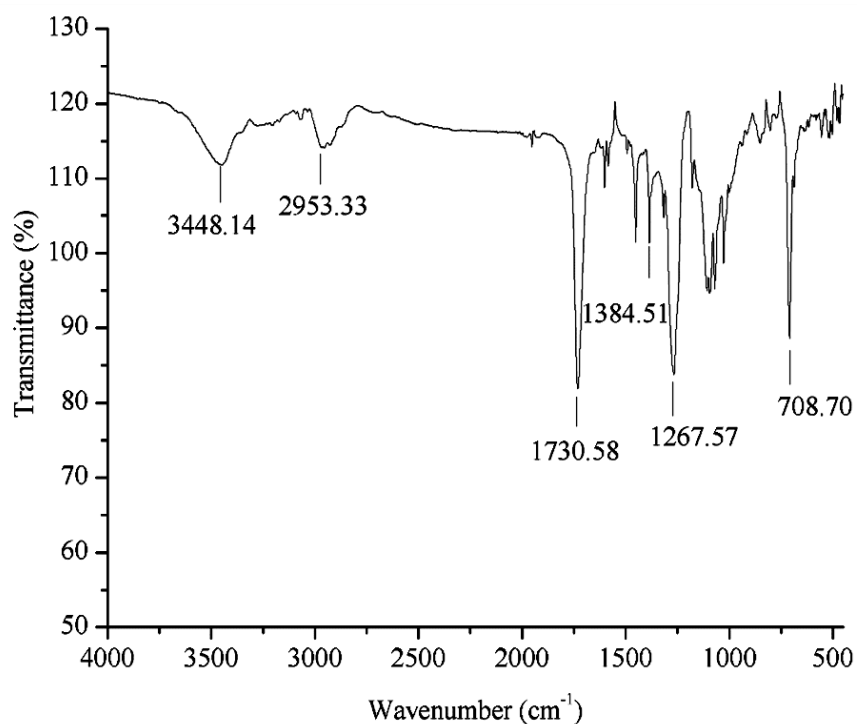

Figure S5. IR spectrum of protected ursolic acid saponin (KBr disc)

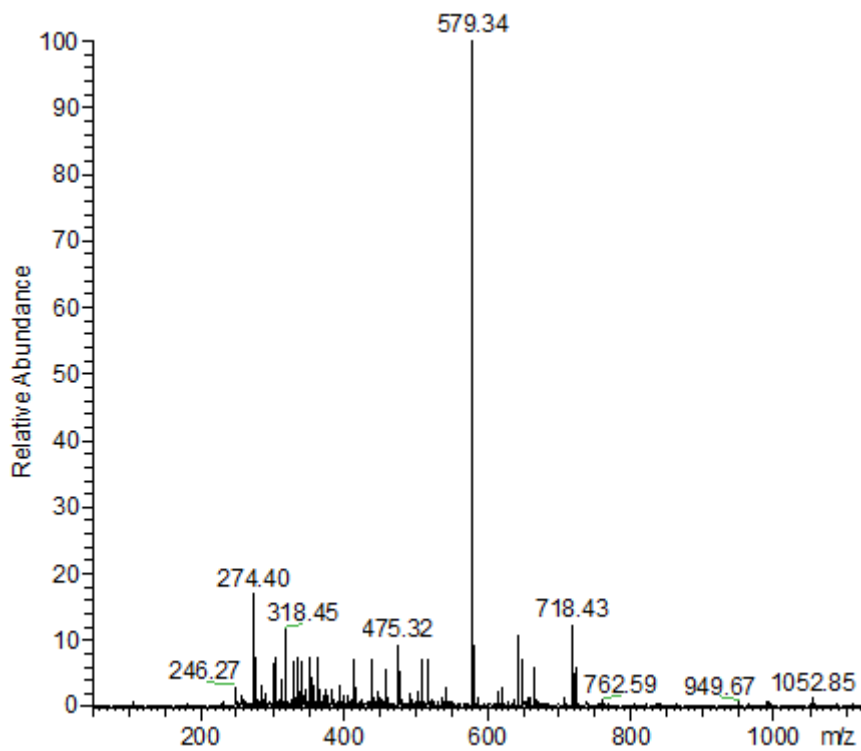

Figure S6. ESI-MS of protected ursolic acid saponin (3.0 kV, 150°C, drying gas: N<sub>2</sub>)

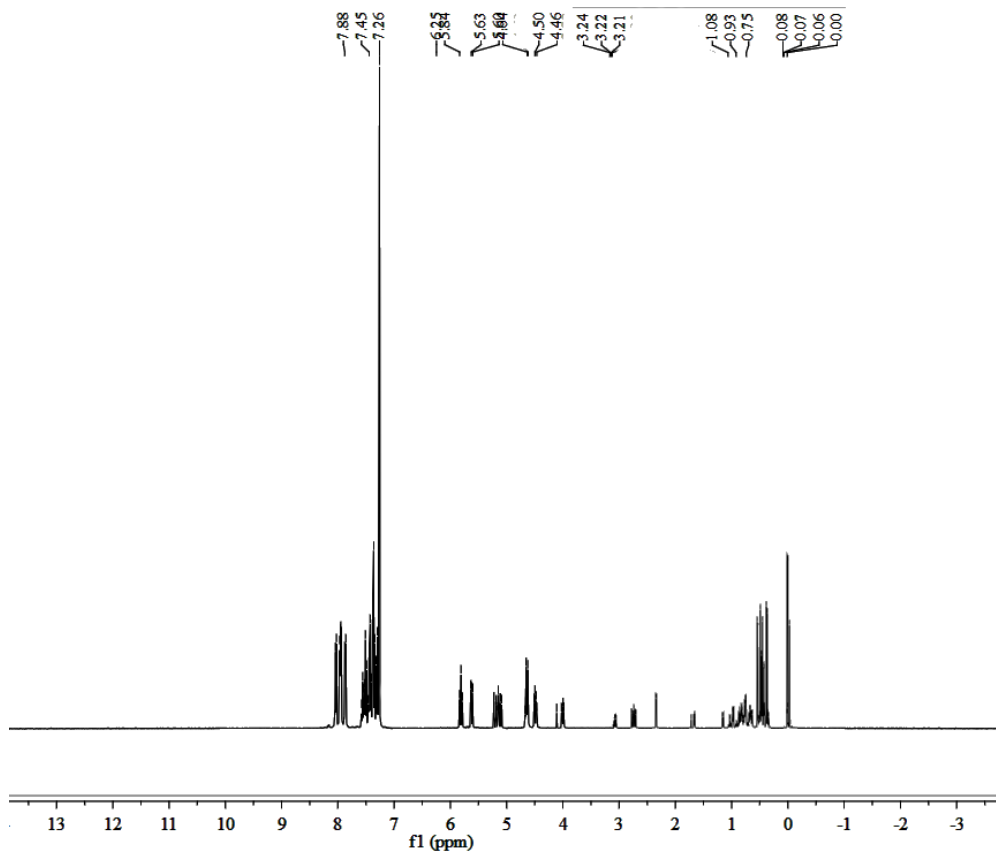

Figure S7.  $^1\text{H}$ -NMR spectrum of protected ursolic acid saponin (400 MHz,  $\text{CDCl}_3$ )

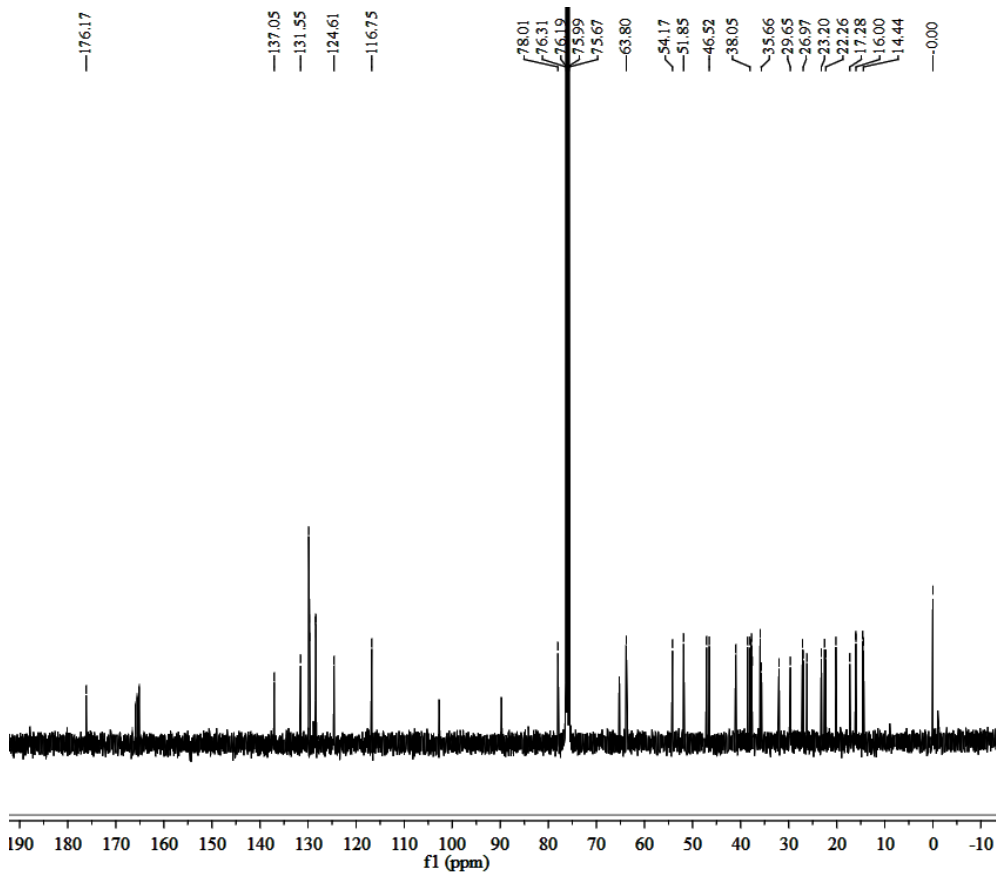

Figure S8.  $^{13}\text{C}$ -NMR spectrum of protected ursolic acid saponin (100 MHz,  $\text{CDCl}_3$ )
